# Supplementary material
Source: MDPI journal article supplement (https://www.mdpi.com/1996-1073/16/21/7459)
Supplement: s1 [file s1]

## S1 KCERT 2050 Calculation Summary

The general calculation flow for KCERT is as follows:

- [1] Lever inputs translated into profiles.
- [2] Priority order applied.
- [3] Energy balance trajectories that represent energy consumption are calculated based on the activity level and energy intensity of the technology.
- [4] Emissions calculated based on energy balance and technology activity.
- [5] Capacity required to satisfy demand calculated.

### S1.1 Example logic trees used to model KCERT 2050: Buildings and Transport Sectors

#### S1.1.1. Buildings Heat and Non-Heat Modules

The logic Trees for KCERT 2050 buildings heat module is illustrated in Figure S 1 and Figure S 2.

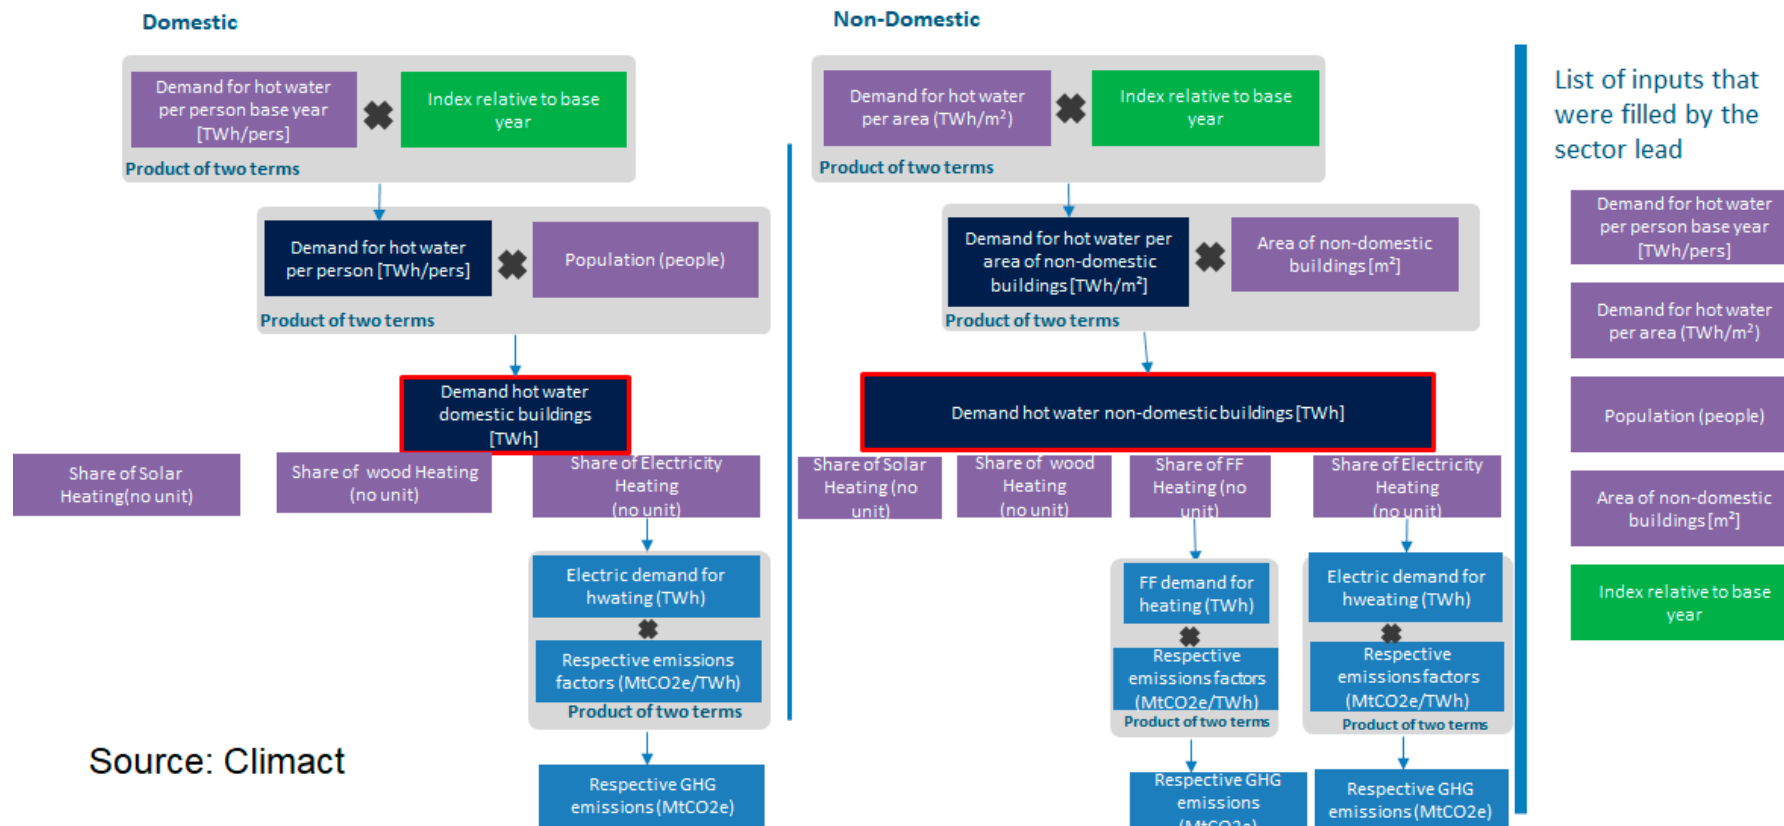

Figure S 1 KCERT 2050 Buildings Module logic tree showing the methodology for calculating demand for domestic and non-domestic buildings. Emission Factor CO<sub>2</sub> bioenergy solid is zero. For hot water heating KCERT considered 4 major fuels that is wood, solar, electricity and fossil fuel boilers. Where electricity, wood and solar were used for domestic households, while for non-domestic buildings there was the addition of fossil fuels. For the levers, they are aimed at moving non-domestic and domestic households from using wood and fossil fuel-based means of water heating to cleaner fuels that is solar an electricity.

From the hot water demand calculation energy consumption and emissions are calculated as illustrated in Figure S 2.

- Hot water supplied by each technology is calculated by multiplying total demand by the technology demand share
- Efficiencies are set for each technology and input fuel and multiplied by output demand individually.
- Energy balance for each technology is calculated based on the heat supplied (activity) and efficiency.
- Greenhouse gas (GHG) emissions output for each technology is calculated by summing fuel input multiplied by the emissions factor, for each fuel consumed.

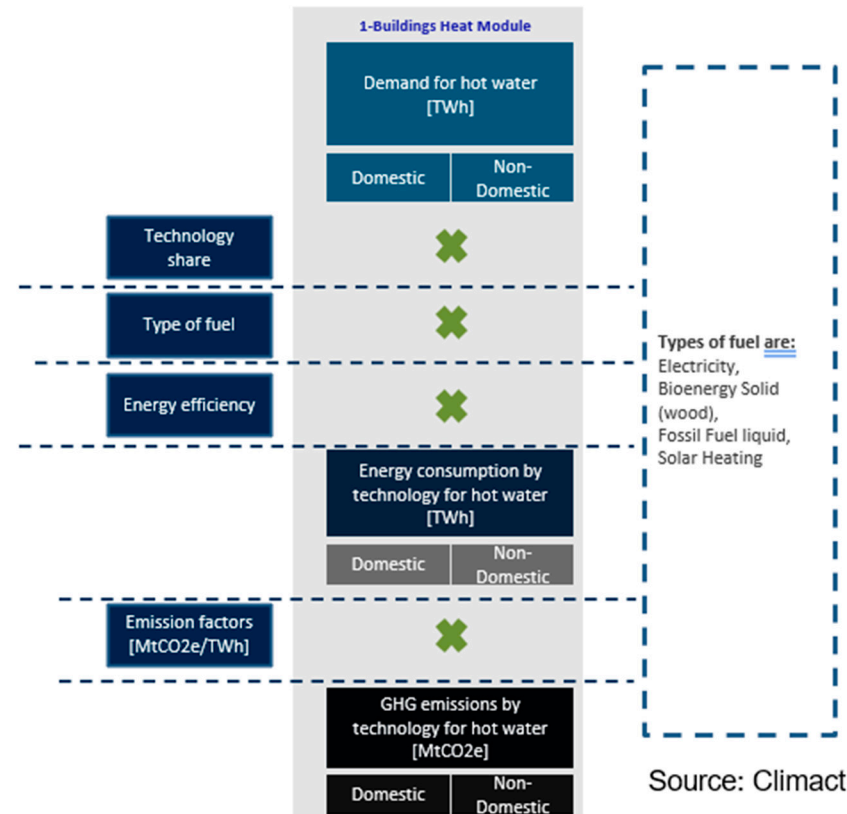

Figure S 2 Hot water supplied by each technology is calculated by multiplying total demand by the technology demand share. Efficiencies are set for each technology for each input fuel and output demand individually. Energy balance for each technology is calculated based on the heat supplied (activity) and efficiency.

The logic Trees for KCERT 2050 buildings non-heat module covering energy demand for cooking, lighting, appliances and cooling are summarised in Figure S 3, Figure S 4, Figure S 5, and Figure S 6.

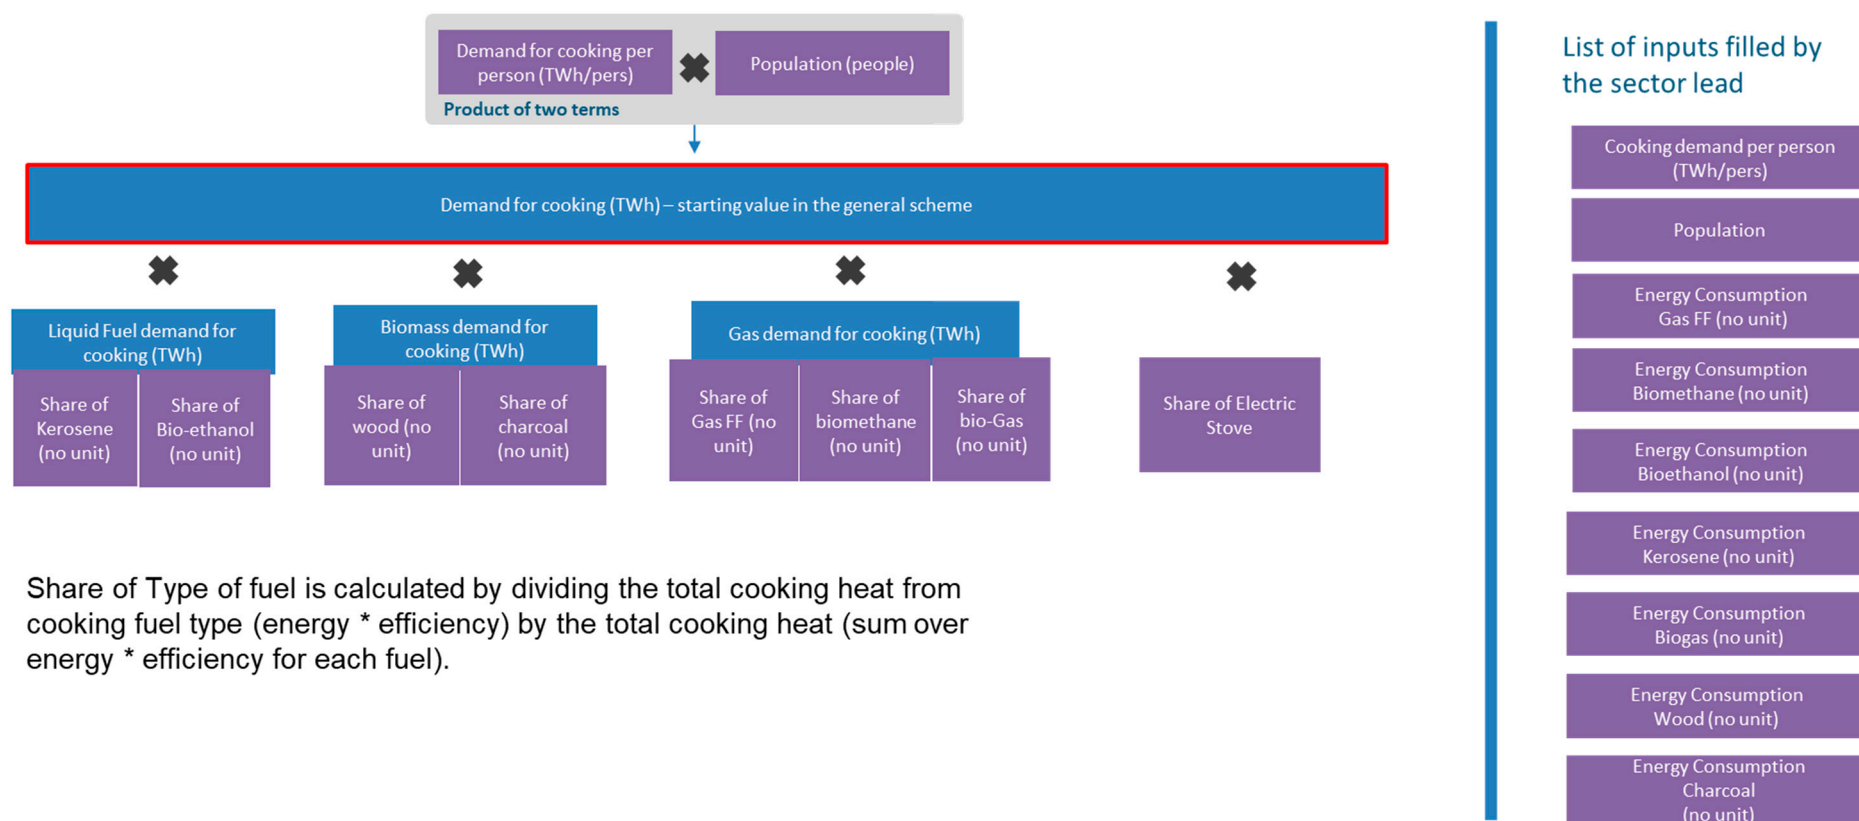

Share of Type of fuel is calculated by dividing the total cooking heat from cooking fuel type (energy \* efficiency) by the total cooking heat (sum over energy \* efficiency for each fuel).

Figure S 3 Buildings non heat module - cooking fuel share. The cooking fuels considered were LPG, electricity, charcoal, kerosene, wood, bioethanol, biogas, and biomethane for institutions and domestic buildings. For non-domestic buildings, only LPG and electricity were considered. Cooking efficiency was deemed not to have significant room for improvement and therefore has no associated efficiency lever.

Cooking energy and emissions were calculated as follows:

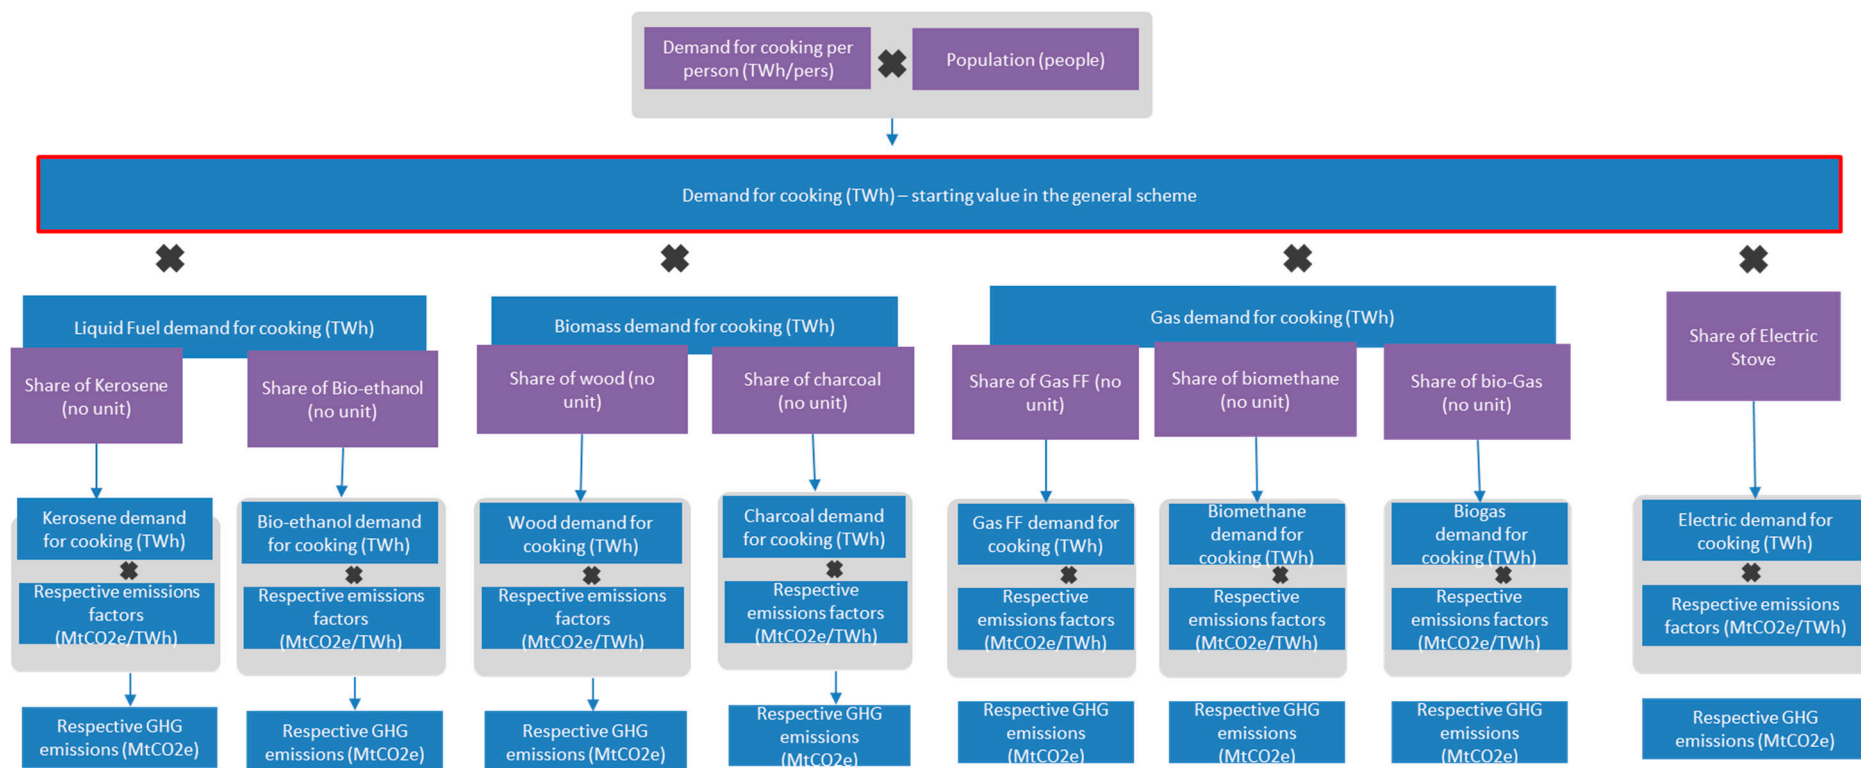

Figure S 4 Buildings non heat module - cooking energy and emissions

Domestic and non-domestic colling energy demand and emissions were calculated as illustrated below.

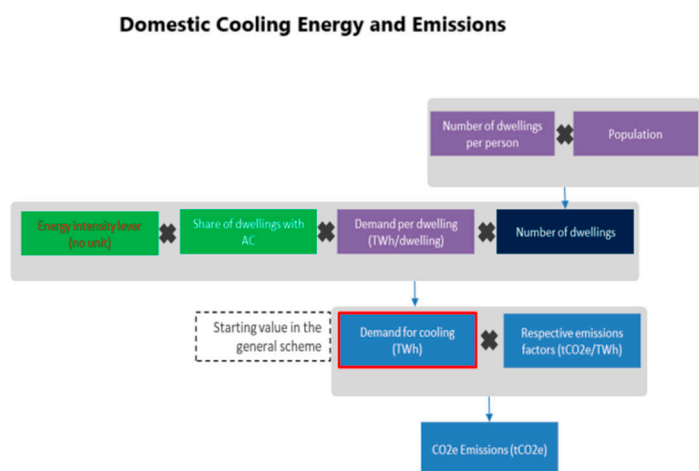

List of inputs filled by the sector lead

- Number of dwellings per person
- Population (people)
- Share of dwellings with AC (no unit)
- Demand for cooling per dwelling (for dwellings that have AC) (TWh/dwelling)

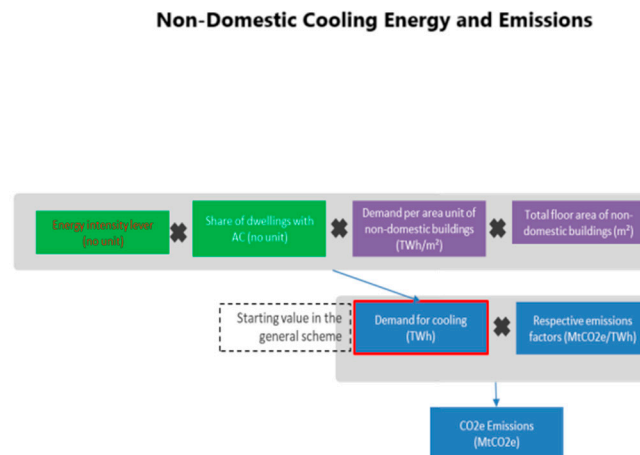

List of inputs filled by the sector lead

- Demand for cooling per area unit of non-domestic buildings (TWh/m<sup>2</sup>)
- Total floor area of non-domestic buildings (m<sup>2</sup>)
- Share of dwellings with AC (no unit)

Source: Climact

Figure S 5 Buildings non heat module – non-domestic cooling energy and emissions

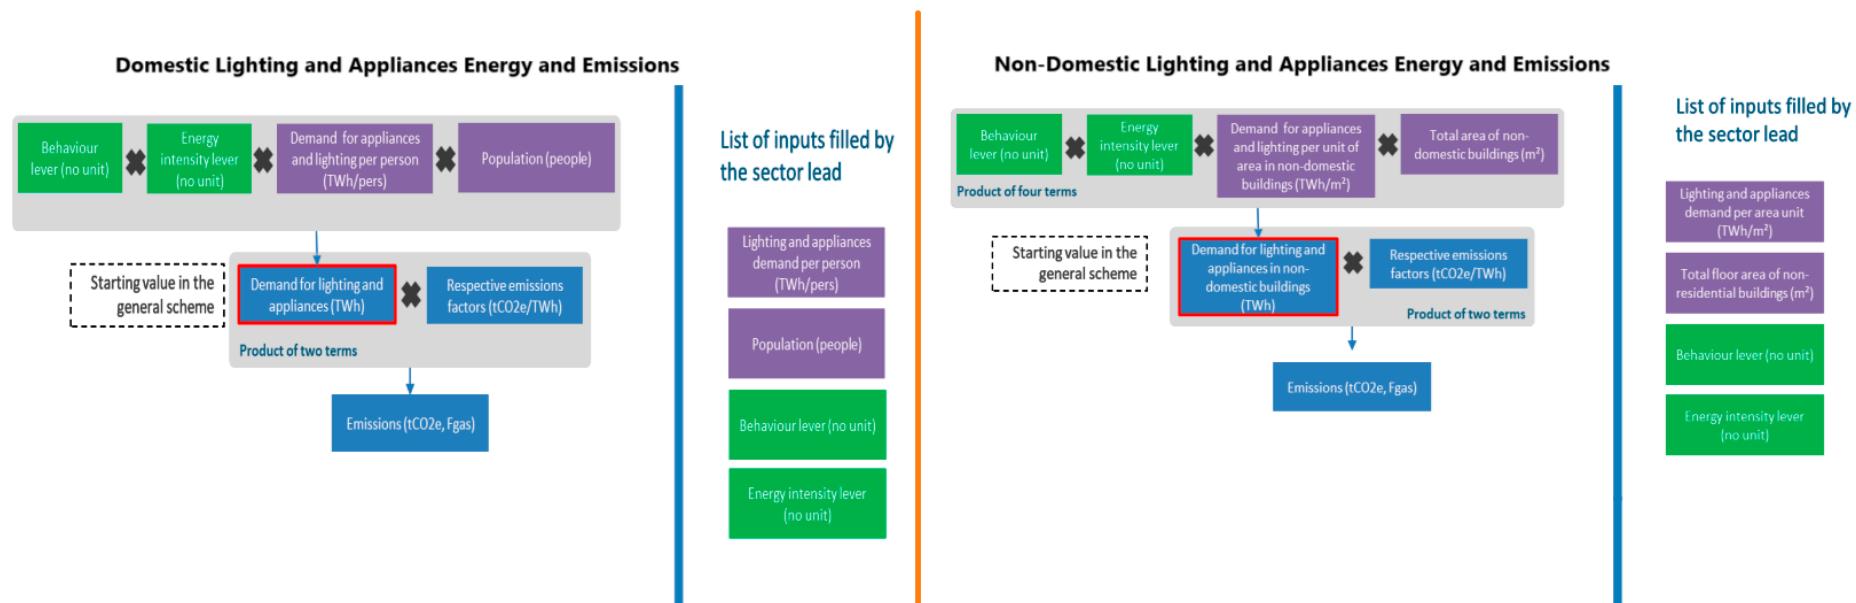

Figure S 6 Buildings non heat module – non-domestic lighting and appliances energy and emissions

### S1.1.2 Transport Sector

The logic tree applied for transportation including aviation, maritime and vehicles.

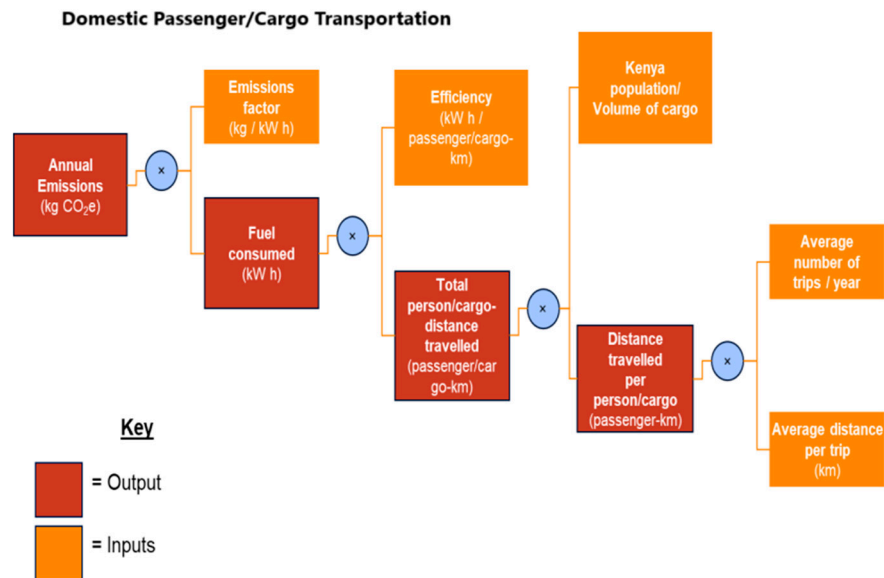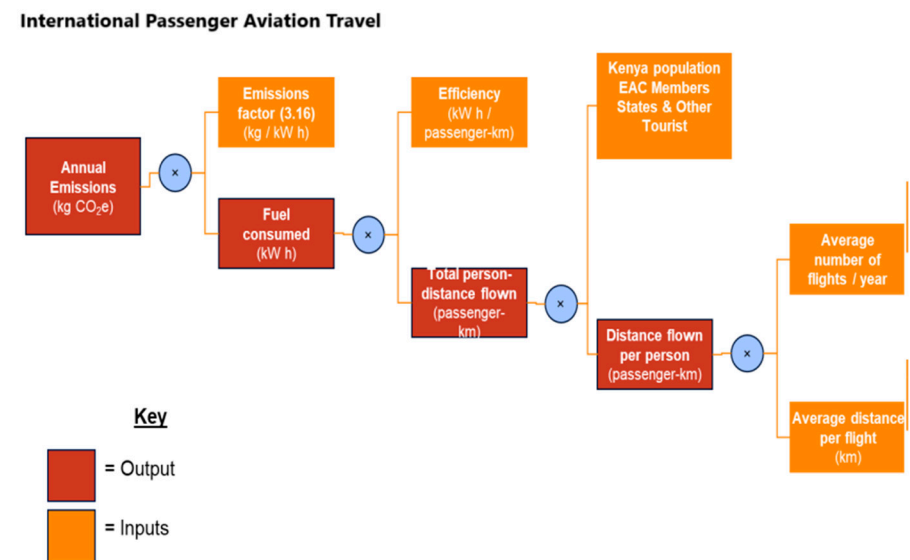

Figure S 7 Transport module fuel consumption and emissions calculation summary.



## 2 KCERT 2050 Levers and Sub-Levers

Table S1 summarises the levers and sub-levers considers in KCERT 2050 for the six sectors.

| <b>Table S1: Levers and Sub-Levers by Sector in KCERT 2050</b> |                           |                                                            |
|----------------------------------------------------------------|---------------------------|------------------------------------------------------------|
| <b>Sector</b>                                                  | <b>Lever</b>              | <b>Sub Lever</b>                                           |
| <b>Transport</b>                                               | Kenya Transport Demand    | Domestic passenger travel demand                           |
|                                                                |                           | Walking share of passenger travel demand                   |
|                                                                |                           | Cycling share of passenger travel demand                   |
|                                                                |                           | Car share of passenger travel demand                       |
|                                                                |                           | Bus and Matatu share of passenger travel demand            |
|                                                                |                           | Rail share of passenger travel demand                      |
|                                                                |                           | Car Occupancy/sharing rates                                |
|                                                                |                           | Car own or hire (average vehicle mileage)                  |
|                                                                | International Aviation    | International passenger travel demand                      |
|                                                                | Light Vehicles - Electric | Car - Electric vehicle distance share                      |
|                                                                |                           | LGV - Electric vehicle distance share                      |
|                                                                |                           | HGV Rigid - Electric vehicle distance share                |
|                                                                | Light Vehicles - Hydrogen | Car - Hydrogen vehicle distance share                      |
|                                                                |                           | LGV - Hydrogen vehicle distance share                      |
|                                                                |                           | HGV Rigid - Hydrogen vehicle distance share                |
|                                                                | Light Vehicles - Hybrid   | Car - Plug-in Hybrid Electric vehicle distance share       |
|                                                                |                           | LGV - Plug-in Hybrid Electric vehicle distance share       |
|                                                                |                           | HGV Rigid - Plug-in Hybrid Electric vehicle distance share |
|                                                                | Light Vehicles - Biofuel  | Car - Biofuel share of liquid fuel                         |
|                                                                |                           | LGV - Biofuel share of liquid fuel                         |
|                                                                |                           | HGV Rigid - Biofuel share of liquid fuel                   |
|                                                                | Heavy Vehicles - Electric | HGV Articulated - Electric vehicle distance share          |
|                                                                |                           | Bus - Electric vehicle distance share                      |
|                                                                |                           | Rail Passenger - Electric vehicle distance share           |
|                                                                |                           | Rail Freight - Electric vehicle distance share             |
|                                                                | Heavy Vehicles - Hydrogen | HGV Articulated - Hydrogen vehicle distance share          |
|                                                                |                           | Bus - Hydrogen vehicle distance share                      |

|                  |                                     |                                                                         |
|------------------|-------------------------------------|-------------------------------------------------------------------------|
|                  | Heavy Vehicles - Hybrid             | HGV Articulated - Plug-in Hybrid Electric vehicle distance share        |
|                  | Heavy Vehicles - Biofuel            | Bus - Plug-in Hybrid Electric vehicle distance share                    |
|                  |                                     | HGV Articulated - Biofuel share of liquid fuel                          |
|                  |                                     | Bus - Biofuel share of liquid fuel                                      |
|                  |                                     | Rail Passenger - Biofuel share of liquid fuel                           |
|                  |                                     | Rail Freight - Biofuel share of liquid fuel                             |
|                  |                                     | Non Road Mobile Machinery - Biofuel share of liquid fuel                |
|                  |                                     | Shipping Domestic - Biofuel share of liquid fuel                        |
|                  |                                     | Shipping International - Biofuel share of liquid fuel                   |
|                  | Aviation Efficiency                 | Aviation Domestic - Energy Intensity Improvement                        |
|                  |                                     | Aviation International - Energy Intensity Improvement                   |
|                  |                                     | Aviation Domestic - Plug-in Hybrid Electric vehicle distance share      |
|                  |                                     | Aviation International - Plug-in Hybrid Electric vehicle distance share |
|                  | Aviation Biofuel                    | Aviation Domestic - Biofuel share of liquid fuel                        |
|                  |                                     | Aviation International - Biofuel share of liquid fuel                   |
| <b>Buildings</b> | Buildings Hot Water and Temperature | Domestic hot water demand index                                         |
|                  |                                     | Non-Domestic hot water demand index                                     |
|                  |                                     | Domestic hot water solar heater share                                   |
|                  |                                     | Domestic hot water electricity share                                    |
|                  |                                     | Domestic hot water wood share                                           |
|                  |                                     | Non-Domestic Solar Heater share                                         |
|                  |                                     | Non-Domestic Electricity share                                          |
|                  |                                     | Non-Domestic Fossil Fuel Boiler share                                   |
|                  |                                     | Non-Domestic Wood share                                                 |
|                  | Domestic Dwelling Cooking           | Domestic dwelling cooking gas share                                     |
|                  |                                     | Domestic dwelling biogas share                                          |
|                  |                                     | Domestic dwelling electricity share                                     |
|                  |                                     | Domestic dwelling wood share                                            |
|                  |                                     | Domestic dwelling charcoal share                                        |
|                  |                                     | Domestic dwelling kerosene share                                        |
|                  |                                     | Domestic dwelling bioethanol share                                      |
|                  |                                     | Domestic dwelling biomethane share                                      |
|                  |                                     | Institution cooking gas share                                           |

|                 |                          |                                                                                                                                                                                                                                                                                                                                                                                                                                                                                                                                                                                                                                                                                                                                                       |
|-----------------|--------------------------|-------------------------------------------------------------------------------------------------------------------------------------------------------------------------------------------------------------------------------------------------------------------------------------------------------------------------------------------------------------------------------------------------------------------------------------------------------------------------------------------------------------------------------------------------------------------------------------------------------------------------------------------------------------------------------------------------------------------------------------------------------|
|                 | Lighting and Appliances  | Institution dwelling biogas share<br>Institution dwelling electricity share<br>Institution dwelling wood share<br>Institution dwelling charcoal share<br>Institution dwelling kerosene share<br>Institution dwelling bioethanol share<br>Institution dwelling biomethane share<br>Share of dwellings with air conditioning<br>Non-Domestic cooling demand<br>Domestic lighting demand<br>Non-Domestic lighting demand<br>Domestic appliance demand<br>Non-Domestic appliance demand<br>Domestic lighting energy intensity<br>Non-Domestic lighting energy intensity<br>Domestic appliance energy intensity<br>Non-Domestic appliance energy intensity<br>Domestic air conditioning energy intensity<br>Non-Domestic air conditioning energy intensity |
| <b>Industry</b> | Industrial Efficiency    | Industrial Energy Intensity Index - Ferrous and non-ferrous metal production<br>Industrial Energy Intensity Index - Cement, ceramics and glass<br>Industrial Process Emissions Index - Ferrous and non-ferrous metal production<br>Industrial Process Emissions Index - Cement, ceramics and glass<br>Industrial Tea<br>Industrial Sugar<br>Industrial Process Emissions Index - Tea<br>Industrial Process Emissions Index - Sugar                                                                                                                                                                                                                                                                                                                    |
|                 | Industry Electrification | Ind process heat share - Ferrous and non-ferrous metal production - Electricity<br>Ind process heat share - Cement, ceramics and glass - Electricity<br>Ind process heat share - Tea - Electricity                                                                                                                                                                                                                                                                                                                                                                                                                                                                                                                                                    |

|                                |                           |                                                                                                                                                                                                                                                                                                                                                                                                                                                                                  |
|--------------------------------|---------------------------|----------------------------------------------------------------------------------------------------------------------------------------------------------------------------------------------------------------------------------------------------------------------------------------------------------------------------------------------------------------------------------------------------------------------------------------------------------------------------------|
|                                | Industry Shift to Biomass | Ind process heat share - Sugar - Electricity<br>Ind process heat share - Ferrous and non-ferrous metal production - Biomass<br>Ind process heat share - Cement, ceramics and glass - Biomass<br>Ind process heat share - Tea - Biomass                                                                                                                                                                                                                                           |
|                                | Industry Shift to Gas     | Ind process heat share - Sugar - Biomass<br>Ind process heat share - Ferrous and non-ferrous metal production - Gas<br>Ind process heat share - Cement, ceramics and glass - Gas<br>Ind process heat share - Tea - Gas                                                                                                                                                                                                                                                           |
|                                | Industry CCS              | Ind process heat share - Sugar - Gas<br>Ind CCS penetration - Ferrous and non-ferrous metal production<br>Ind CCS penetration - Cement, ceramics and glass<br>Ind CCS penetration - Tea<br>Ind CCS penetration - Sugar                                                                                                                                                                                                                                                           |
| <b>CO2 Removal &amp; Gases</b> | Hydrogen - Imports        | Zero Carbon hydrogen imports                                                                                                                                                                                                                                                                                                                                                                                                                                                     |
|                                | Greenhouse Gas Removal    | Carbon Captured - Direct Air Capture<br>Carbon Captured - Enhanced Weathering                                                                                                                                                                                                                                                                                                                                                                                                    |
|                                | Bioconversion with CCS    | Share of conversions with CCS - Biomass Gasification<br>Share of conversions with CCS - Bio liquid Production<br>Share of conversions with CCS - Energy from Waste                                                                                                                                                                                                                                                                                                               |
|                                | CCS Capture Rate          | CCS Capture Rate - Ferrous and non-ferrous metal production<br>CCS Capture Rate - Cement, ceramics and glass<br>CCS Capture Rate - Biomass Gasification<br>CCS Capture Rate - Bio liquid Production<br>CCS Capture Rate - Energy from Waste<br>CCS Capture Rate - H2 from Biomass Gasification<br>CCS Capture Rate - H2 from SMR<br>CCS Capture Rate - Electricity from Biomass<br>CCS Capture Rate - Electricity from Gas<br>CCS Capture Rate - Tea<br>CCS Capture Rate - Sugar |
| <b>Electricity</b>             | Seasonal Storage          | Capacity Electricity - Seasonal Storage                                                                                                                                                                                                                                                                                                                                                                                                                                          |
|                                | Hydo Electric Power       | Capacity Electricity - Hydro                                                                                                                                                                                                                                                                                                                                                                                                                                                     |

|                                    |                            |                                                             |
|------------------------------------|----------------------------|-------------------------------------------------------------|
| <b>Land, Bioenergy &amp; Waste</b> | Geothermal                 | Capacity Electricity - Geothermal                           |
|                                    | Thermal - Mini Grid        | Capacity Electricity - Thermal Mini Grid                    |
|                                    | Natural Gas                | Capacity Electricity - Natural Gas                          |
|                                    | Power Imports              | Capacity Electricity - Power Imports                        |
|                                    | Nuclear                    | Capacity Electricity - Nuclear                              |
|                                    | Onshore Wind               | Capacity Electricity - Wind (onshore)                       |
|                                    | Solar                      | Capacity Electricity - Solar PV                             |
|                                    | Farming Yield & Efficiency | Number of Livestock - Poultry                               |
|                                    |                            | Number of Livestock - Cattle                                |
|                                    |                            | Number of Livestock - Other                                 |
|                                    |                            | Yield (output per unit area) - Land for Bioenergy           |
|                                    |                            | Yield (output per unit area) - Land for food crops          |
|                                    |                            | Yield (output per unit area) - Land for livestock           |
|                                    |                            | Emissions intensity index - Livestock Enteric Fermentation  |
|                                    |                            | Emissions intensity index - Livestock Manure Management     |
|                                    |                            | Emissions intensity index - Arable land for food crops      |
|                                    |                            | Emissions intensity index - Soil Management                 |
|                                    |                            | Agricultural Fuel Use - Biofuel share of liquid fuel        |
|                                    | Forestry                   | Land area dedicated to Woodland                             |
|                                    | Land for Bioenergy         | Land area dedicated to Growing Bioenergy                    |
|                                    |                            | Wood share for energy from Baseline Woodland                |
|                                    |                            | Waste share collected for energy land for food crops        |
|                                    |                            | Waste share collected for energy Manure deposited as slurry |
|                                    | Waste Reduction            | Share Recycled - Dry Waste (excluding inert)                |
|                                    |                            | Share Recycled - Wet Waste (excluding manure)               |
|                                    |                            | Share Recycled - Waste Water                                |
|                                    |                            | Share Recycled - Used Cooking Oil                           |
|                                    |                            | Share Open Burning - Dry Waste (excluding inert)            |
|                                    |                            | Share to Energy - Dry Waste (excluding inert)               |
|                                    |                            | Share to Composting - Wet Waste (excluding manure)          |
|                                    |                            | Share to Energy - Wet Waste (excluding manure)              |
|                                    |                            | Share to Energy - Used Cooking Oil                          |

|                                                     |
|-----------------------------------------------------|
| Share Released as Fugitive Emissions - Landfill Gas |
| Reduce Production - Dry Waste (excluding inert)     |
| Reduce Production - Wet Waste (excluding manure)    |
| Reduce Production - Used Cooking Oil                |
| Reduce Production - Wate Water (excluding inert)    |

---

### 3 KCERT 2050 Net Zero Emissions Pathway

Table S2 includes the levers and level of ambition needed for the net zero pathway by 2050.

| <b>Table S2: Sector Levers and the levels of ambition for the net zero emissions pathway</b> |                                     |                                           |                                                                                                                                                                                                                                               |
|----------------------------------------------------------------------------------------------|-------------------------------------|-------------------------------------------|-----------------------------------------------------------------------------------------------------------------------------------------------------------------------------------------------------------------------------------------------|
| <b>Sector</b>                                                                                | <b>Lever</b>                        | <b>Net Zero Pathway Level of Ambition</b> | <b>Net Zero Pathway Level of Ambition Description</b>                                                                                                                                                                                         |
| <b>Transport</b>                                                                             | Kenya Transport Demand              | 2.70750                                   | By 2050 the average annual distance travelled per person is 32% less than in 2015. 30% of this is done by car.                                                                                                                                |
|                                                                                              | International Aviation              | 1.03955                                   | By 2050 the average annual distance travelled per person internationally is 121% further than in 2015.                                                                                                                                        |
|                                                                                              | Light Vehicles - Electric           | 2.67108                                   | 50% of cars are electric by 2050 (50% of vans and 25% of small trucks).                                                                                                                                                                       |
|                                                                                              | Light Vehicles - Hydrogen           | 1.06815                                   | 0% of cars are hydrogen-fuelled by 2050 (0% of vans and 0% of small trucks).                                                                                                                                                                  |
|                                                                                              | Light Vehicles - Hybrid             | 1.06147                                   | 0% of cars are hybrids by 2050 (0% of vans and 0% of small trucks).                                                                                                                                                                           |
|                                                                                              | Light Vehicles - Biofuel            | 2.12953                                   | 20% of fuel used in conventional cars is biofuel by 2050 (20% of vans and 1% of small trucks).                                                                                                                                                |
|                                                                                              | Heavy Vehicles - Electric           | 2.81491                                   | 10% of large trucks, 30% of buses and 90% of passenger trains are electric by 2050.                                                                                                                                                           |
|                                                                                              | Heavy Vehicles - Hydrogen           | 1.41058                                   | 0% of large trucks and 0% of buses are hydrogen-fuelled by 2050.                                                                                                                                                                              |
|                                                                                              | Heavy Vehicles - Hybrid             | 1.27815                                   | 1% of large trucks and 20% of buses are hybrids by 2050.                                                                                                                                                                                      |
|                                                                                              | Heavy Vehicles - Biofuel            | 1.36877                                   | 20% of buses, 0% of passenger trains and 1% of large trucks use biofuel by 2050.                                                                                                                                                              |
|                                                                                              | Aviation Efficiency                 | 1.16397                                   | Aircrafts are 18% more efficient than in 2015 and 0% are plug-in hybrid electric vehicles, by 2050.                                                                                                                                           |
|                                                                                              | Aviation Biofuel                    | 1.09043                                   | 0% of liquid fuel used in aircraft is biofuel by 2050.                                                                                                                                                                                        |
| <b>Buildings</b>                                                                             | Buildings Hot Water and Temperature | 1.016489948                               | By 2050, domestic hot water demand is 30% more than in 2015. By 2050, for residential buildings, 23% more homes use wood to heat water than in 2015. the use of solar in homes is the same as in 2015. 23% less homes use electricity to heat |

|                                |                           |         |                                                                                                                                                                                                                                                                                                                                                                                                                                                                                                                                                                                                                                                                                                |
|--------------------------------|---------------------------|---------|------------------------------------------------------------------------------------------------------------------------------------------------------------------------------------------------------------------------------------------------------------------------------------------------------------------------------------------------------------------------------------------------------------------------------------------------------------------------------------------------------------------------------------------------------------------------------------------------------------------------------------------------------------------------------------------------|
|                                | Domestic Dwelling Cooking | 1.59746 | <p>water than in 2015. By 2050. For non-residential buildings, 3% more buildings use wood to heat water than in 2015. 0.1% more buildings use solar to heat water than in 2015. 2.6% less buildings use electricity to heat water than in 2015. 0.4 % less buildings use fossil fuel to heat water than in 2015.</p> <p>By 2050, for residential buildings there will be 5% more usage of biofuels in cooking than in 2015. For fossil fuel use in cooking in residential buildings it will be , 55.2% less than in 2015. For wood fuel use in cooking in residential buildings it will be , 37.56% less than in 2015. For electricity use in cooking it will be 28.43% more than in 2015.</p> |
|                                | Lighting and Appliances   | 1.00000 | <p>By 2050, compared to 2015, domestic lighting demand per person is 50% higher and the same efficiency, appliance demand is 50% higher and the same efficiency</p>                                                                                                                                                                                                                                                                                                                                                                                                                                                                                                                            |
| <b>Industry</b>                | Industrial Efficiency     | 2.11185 | 20% decrease in energy consumption and 30% decrease in process emissions, per unit of output by 2050                                                                                                                                                                                                                                                                                                                                                                                                                                                                                                                                                                                           |
|                                | Industry Electrification  | 3.23600 | 70% of heat generated from electricity in industry sub-sectors by 2050 (compared to 0% in 2015).                                                                                                                                                                                                                                                                                                                                                                                                                                                                                                                                                                                               |
|                                | Industry Shift to Biomass | 2.14700 | 35% to 100% of heat generated from biomass in industry steel and cement sub-sectors by 2050 (compared to 0% in 2015).                                                                                                                                                                                                                                                                                                                                                                                                                                                                                                                                                                          |
|                                | Industry Shift to Gas     | 1.00000 | 15% to 30% of heat generated from gas in industry sub-sectors by 2050 (compared to 0% in 2015).                                                                                                                                                                                                                                                                                                                                                                                                                                                                                                                                                                                                |
|                                | Industry CCS              | 1.00000 | 0% of processes have CCS applied across industrial sub-sectors by 2060 (compared to 0% in 2015).                                                                                                                                                                                                                                                                                                                                                                                                                                                                                                                                                                                               |
| <b>CO2 Removal &amp; Gases</b> | Hydrogen - Imports        | 1.00000 | No hydrogen imported                                                                                                                                                                                                                                                                                                                                                                                                                                                                                                                                                                                                                                                                           |
|                                | Greenhouse Gas Removal    | 1.00000 | No emissions captured                                                                                                                                                                                                                                                                                                                                                                                                                                                                                                                                                                                                                                                                          |
|                                | Bioconversion with CCS    | 1.27661 | 33% of bio-conversion processes have CCS applied by 2070                                                                                                                                                                                                                                                                                                                                                                                                                                                                                                                                                                                                                                       |
|                                | CCS Capture Rate          | 1.00000 | 0% capture rate range for CCS processes by 2070.                                                                                                                                                                                                                                                                                                                                                                                                                                                                                                                                                                                                                                               |
| <b>Electricity</b>             | Seasonal Storage          | 1.00000 | No electricity stored between seasons (none stored in 2015).                                                                                                                                                                                                                                                                                                                                                                                                                                                                                                                                                                                                                                   |
|                                | Hydo Electric Power       | 1.00000 | 0.698 GW capacity by 2050 (0 GW in 2015) capable of generating up to 5 TWh per year.                                                                                                                                                                                                                                                                                                                                                                                                                                                                                                                                                                                                           |



|                                    |                            |         |                                                                                                                                                                           |
|------------------------------------|----------------------------|---------|---------------------------------------------------------------------------------------------------------------------------------------------------------------------------|
| <b>Land, Bioenergy &amp; Waste</b> | Geothermal                 | 1.00000 | 0 GW capacity by 2050 (0.77 GW in 2015) capable of generating up to 26 TWh per year.                                                                                      |
|                                    | Thermal - Mini Grid        | 1.00000 | Decommissioned by 2050.                                                                                                                                                   |
|                                    | Natural Gas                | 1.08174 | 2.514 GW capacity by 2050 (0 GW in 2015)                                                                                                                                  |
|                                    | Power Imports              | 1.00000 | 1.154 GW capacity by 2050                                                                                                                                                 |
|                                    | Nuclear                    | 1.00000 | 0.698 GW capacity by 2050 (0 GW capacity in 2015) capable of generating up to 5 TWh per year. Equivalent to 0.2 3 GW plants.                                              |
|                                    | Onshore Wind               | 1.00000 | 3.2 GW capacity by 2050, 3.2 GW onshore (10.1x the 0.3 GW capacity in 2015) capable of generating up to 13 TWh per year.                                                  |
|                                    | Solar                      | 1.00000 | 1.669 GW capacity by 2050 (33.4x the 0.1 GW capacity in 2015) capable of generating up to 3 TWh per year.                                                                 |
|                                    | Farming Yield & Efficiency | 4.00000 | In 2050, emissions intensity is 25-51% lower, land yield is 100-213% higher, there are 25% fewer cattle, 51% more poultry and 25% fewer other livestock compared to 2015. |
|                                    | Forestry                   | 4.00000 | 9% of Kenya land area covered by forest by 2070 (compared to 7% in 2015).                                                                                                 |
|                                    | Land for Bioenergy         | 1.00000 | 0.6% of Kenya land area covered by bio crops by 2050 (compared to 0% in 2015) and 8-40% of agricultural wastes are collected for energy.                                  |
|                                    | Waste Reduction            | 3.59702 | By 2050, 30% decrease in dry waste (30% recycled, 3% used for energy), 30% decrease in wet waste (60% recycled, 8% used for energy).                                      |
